# Supplementary material for: Age-related increase of VGF-expression in T lymphocytes
Source: publisher site journal article supplement (doi:10.18632/aging.100656), 2014-05-04
Supplement: Supplementary file [file aging-v6i6-100656-supplementary-material-SD1.pdf]

compartment requires monocytes and promotes inflammation in type 2 diabetes. *J Immunol.* 186:1162-1172.

67. Facchini A, Mariani E, Mariani AR, Papa S, Vitale M, Manzoli FA. Increased number of circulating Leu 11+ (CD 16) large granular lymphocytes and decreased NK activity during human ageing. *Clin Exp Immunol.* 1987; 68:340-347.

68. Vitale M, Zamai L, Neri LM, Galanzi A, Facchini A, Rana R, Cataldi A, Papa S. The impairment of natural killer function in the healthy aged is due to a postbinding deficient mechanism. *Cell Immunol.* 1992; 145:1-10.

69. Borrego F, Alonso C, Galiani M, Carracedo J, Ramirez R, Ostos B, Pena J, Solana R. NK phenotypic markers and IL2 response in NK cells from elderly people. *Experimental gerontology.* 1999; 34:253-265.

## SUPPLEMENTARY FIGURES AND TABLES

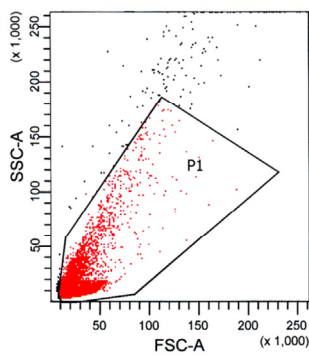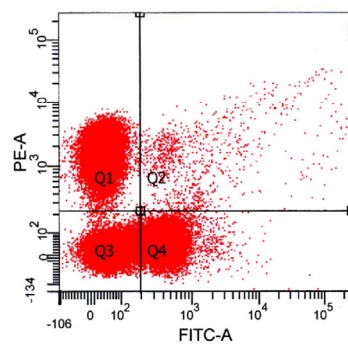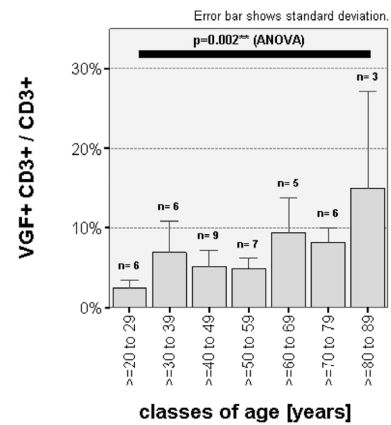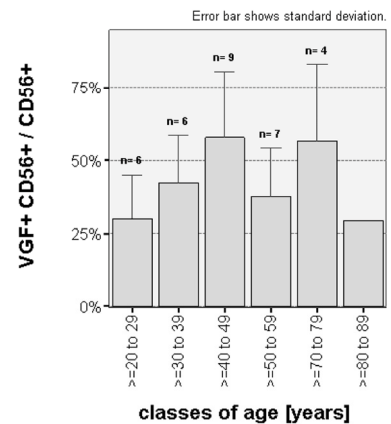

**Supplementary Figure 1. Flow cytometry of VGF+CD3+ T cells.** Isolated PBMC were stained with anti-VGF (D20) and anti-goat IgG-FITC and PE-labeled Abs against CD3 or CD56. First, the lymphocyte gate was set (left side) and then the frequency of VGF+ CD3+ cells detected (right side).

**Supplementary Figure 2. VGF expression according to aged groups.** The volunteers were grouped in ten-year-ranges. The relative numbers VGF+CD3+ T cells and VGF+CD56+ NK cells was calculated as percentage of the measured CD3 T cells or CD56+ NK cell numbers.

**Supplementary Table 1. Demographic and blood parameters.**

Routine blood parameters and demographic data, underlying diseases and medication as well as the number of VGF+CD3+ and VGF+CD56+ cells of the study cohort are shown in Suppl. Table 1.

| demographic data |             |                               | routine blood parameters        |                 |                                     |          |                           |                       |                      |              |              |           |
|------------------|-------------|-------------------------------|---------------------------------|-----------------|-------------------------------------|----------|---------------------------|-----------------------|----------------------|--------------|--------------|-----------|
| Case             | age [years] | sex<br>[f - female, m - male] | number of leukocytes<br>[Gpt/l] | lymphocytes [%] | number of<br>lymphocytes<br>[Gpt/l] | PBMC [%] | number of PBMC<br>[Gpt/l] | triglyceride [mmol/l] | cholesterol [mmol/l] | HDL [mmol/l] | LDL [mmol/l] | HbA1c [%] |
| 1                | 22          | m                             | 7,0                             | 0,50            | 3,50                                | 0,56     | 3,92                      | 0,81                  | 5,05                 | 1,53         | 3,15         | 5,1       |
| 2                | 22          | f                             | 10,1                            | 0,31            | 3,13                                | 0,36     | 3,64                      | 1,09                  | 3,46                 | 1,98         | 0,98         | 5         |
| 3                | 28          | f                             | 10,0                            | 0,42            | 4,20                                | 0,47     | 4,70                      | 0,80                  | 4,39                 | 1,54         | 2,49         | 5,1       |
| 4                | 28          | m                             | 7,0                             | 0,30            | 2,10                                | 0,35     | 2,45                      | 1,02                  | 3,54                 | 1,26         | 1,82         | 4,5       |
| 5                | 25          | f                             | 10,1                            | 0,41            | 4,14                                | 0,46     | 4,65                      | 1,28                  | 5,15                 | 2,53         | 2,04         | 4,9       |
| 6                | 32          | f                             | 7,5                             | 0,35            | 2,63                                | 0,38     | 2,85                      | 0,92                  | 6,25                 | 2,42         | 3,41         | 5,5       |
| 7                | 42          | f                             | 8,0                             | 0,27            | 2,16                                | 0,32     | 2,56                      | 0,93                  | 4,52                 | 4,51         | 2,59         | 5         |
| 8                | 25          | m                             | 7,5                             | 0,26            | 1,95                                | 0,32     | 2,40                      | 1,04                  | 4,30                 | 1,21         | 2,62         | 4,9       |
| 9                | 38          | f                             | 11,2                            | 0,25            | 2,80                                | 0,30     | 3,36                      | 0,80                  | 5,00                 | 1,27         | 3,37         | 5,3       |
| 10               | 38          | m                             | 9,8                             | 0,47            | 4,61                                | 0,59     | 5,78                      | 2,72                  | 4,41                 | 1,13         | 2,04         | 5,5       |
| 11               | 35          | f                             | 4,3                             | 0,27            | 1,16                                | 0,34     | 1,46                      | 0,40                  | 4,04                 | 1,49         | 2,37         | 5,7       |
| 12               | 58          | f                             | 4,6                             | 0,40            | 1,84                                | 0,48     | 2,21                      | 0,85                  | 4,13                 | 1,41         | 2,33         | 5,7       |
| 13               | 48          | f                             | 4,5                             | 0,32            | 1,44                                | 0,38     | 1,71                      | 1,16                  | 4,75                 | 1,59         | 2,63         | 5,3       |
| 14               | 52          | m                             | 7,8                             | 0,27            | 2,11                                | 0,34     | 2,65                      | 0,90                  | 4,76                 | 1,24         | 3,11         | 5,8       |
| 15               | 42          | m                             | 5,4                             | 0,21            | 1,13                                | 0,28     | 1,51                      | 2,25                  | 5,45                 | 1,34         | 3,09         | 5,4       |
| 16               | 52          | f                             | 6,7                             | 0,20            | 1,34                                | 0,24     | 1,61                      | 1,13                  | 5,32                 | 1,79         | 3,02         | 5,3       |
| 17               | 32          | m                             | 8,4                             | 0,46            | 3,86                                | 0,51     | 4,28                      | 0,69                  | 4,68                 | 1,34         | 3,30         | 5,3       |
| 18               | 58          | m                             | 6,0                             | 0,40            | 2,40                                | 0,47     | 2,82                      | 0,62                  | 5,94                 | 1,37         | 4,29         | 5,8       |
| 19               | 55          | f                             | 4,8                             | 0,49            | 2,35                                | 0,53     | 2,54                      | 0,55                  | 6,69                 | 2,37         | 4,07         | 5,7       |
| 20               | 55          | m                             | 7,6                             | 0,30            | 2,28                                | 0,35     | 2,66                      | 1,19                  | 4,25                 | 1,38         | 2,33         | 5,3       |
| 21               | 45          | m                             | 8,3                             | 0,19            | 1,58                                | 0,26     | 2,16                      | 2,49                  | 5,40                 | 1,34         | 2,93         | 5,7       |
| 22               | 55          | m                             | 4,7                             | 0,24            | 1,13                                | 0,31     | 1,46                      | 2,50                  | 5,18                 | 1,65         | 2,39         | 5,9       |
| 23               | 45          | f                             | 6,6                             | 0,36            | 2,38                                | 0,40     | 2,64                      | 10,46                 | 6,83                 | 1,26         | -            | 5,2       |
| 24               | 35          | m                             | 4,8                             | 0,35            | 1,68                                | 0,41     | 1,97                      | 0,85                  | 4,98                 | 1,29         | 3,30         | 5,3       |
| 25               | 42          | f                             | 6,5                             | 0,25            | 1,63                                | 0,29     | 1,89                      | 1,49                  | 5,56                 | 1,47         | 3,41         | 5,6       |
| 26               | 45          | m                             | 4,6                             | 0,35            | 1,61                                | 0,42     | 1,93                      | 2,86                  | 6,12                 | 1,22         | 3,60         | 5,2       |
| 27               | 40          | m                             | 7,4                             | 0,37            | 2,74                                | 0,49     | 3,63                      | 2,27                  | 6,41                 | 1,08         | 4,30         | 5,7       |
| 28               | 46          | f                             | 9,4                             | 0,36            | 3,38                                | 0,04     | 0,39                      | 0,64                  | 5,84                 | 1,85         | 3,70         | 5,5       |
| 29               | 64          | f                             | 5,4                             | 0,31            | 1,67                                | 0,36     | 1,94                      | 1,33                  | 5,66                 | 2,29         | 2,77         | 5,6       |
| 30               | 63          | m                             | 4,8                             | 4,00            | 19,20                               | 0,48     | 2,30                      | 3,22                  | 6,43                 | 1,40         | 3,57         | 5,9       |
| 31               | 88          | f                             | 5,7                             | 0,34            | 1,94                                | 0,43     | 2,45                      | 1,41                  | 7,20                 | 1,91         | 4,65         | 5,7       |
| 32               | 75          | f                             | 6,9                             | 0,18            | 1,24                                | 0,27     | 1,86                      | 6,96                  | 9,73                 | 1,16         | -            | 6,3       |
| 33               | 67          | f                             | 7,4                             | 0,27            | 2,00                                | 0,37     | 2,74                      | 2,11                  | 6,12                 | 1,94         | 3,22         | 6,1       |
| 34               | 79          | m                             | 6,9                             | 0,18            | 1,24                                | 0,25     | 1,73                      | 1,82                  | 3,48                 | 1,04         | 1,61         | 5         |
| 35               | 64          | f                             | 5,7                             | 0,36            | 2,05                                | 0,54     | 3,08                      | 1,38                  | 4,65                 | 1,61         | 2,41         | 5,8       |
| 36               | 82          | m                             | 5,1                             | 0,34            | 1,73                                | 0,49     | 2,50                      | 0,75                  | 3,75                 | 1,18         | 2,20         | 6,7       |
| 37               | 74          | f                             | 7,5                             | 0,15            | 1,13                                | 0,22     | 1,65                      | 0,90                  | 6,95                 | 2,39         | 4,15         | 5,8       |
| 38               | 86          | m                             | 5,8                             | 0,32            | 1,86                                | 0,40     | 2,32                      | 0,86                  | 3,95                 | 1,77         | 1,79         | 5,1       |
| 39               | 72          | m                             | 5,4                             | 0,20            | 1,08                                | 0,26     | 1,40                      | 1,05                  | 5,08                 | 1,79         | 2,81         | 5,2       |
| 40               | 76          | f                             | 6,4                             | 0,16            | 1,02                                | 0,23     | 1,47                      | 0,56                  | 7,01                 | 2,21         | 4,55         | 5,6       |
| 41               | 73          | f                             | 9,0                             | 0,23            | 2,07                                | 0,29     | 2,61                      | 1,72                  | 6,38                 | 1,89         | 3,71         | 5,9       |
| 42               | 61          | f                             | 5,7                             | 0,21            | 1,20                                | 0,26     | 1,48                      | 1,01                  | 5,95                 | 1,56         | 3,93         | 5,6       |

| Case | demographic |                            |                          |                  |                  | Mini Mental Status-Test | disease                                                                                             |                                                                                                       | blood                |                     |
|------|-------------|----------------------------|--------------------------|------------------|------------------|-------------------------|-----------------------------------------------------------------------------------------------------|-------------------------------------------------------------------------------------------------------|----------------------|---------------------|
|      | age [years] | sex [f - female, m - male] | BMI [kg/m <sup>2</sup> ] | body height [cm] | body weight [kg] |                         | diseases                                                                                            | medication                                                                                            | VGF+ CD3+ / CD3+ [%] | VGF+CD56+/CD56+ [%] |
| 1    | 22          | m                          | n.a.                     | n.a.             | n.a.             | 30                      |                                                                                                     |                                                                                                       | 1,73%                | 5,30%               |
| 2    | 22          | f                          | 19,33                    | n.a.             | n.a.             | 30                      |                                                                                                     |                                                                                                       | 1,62%                | 20,78%              |
| 3    | 28          | f                          | 19,30                    | n.a.             | n.a.             | 30                      |                                                                                                     |                                                                                                       | 1,71%                | 33,90%              |
| 4    | 28          | m                          | 22,70                    | n.a.             | n.a.             | 30                      |                                                                                                     |                                                                                                       | 2,80%                | 46,15%              |
| 5    | 25          | f                          | 24,49                    | 175              | 75               | 30                      |                                                                                                     |                                                                                                       | 3,07%                | 41,18%              |
| 6    | 32          | f                          | 26,99                    | 170              | 78               | 30                      |                                                                                                     |                                                                                                       | 5,69%                | 35,63%              |
| 7    | 42          | f                          | 25,00                    | n.a.             | n.a.             | 30                      |                                                                                                     |                                                                                                       | 3,43%                | 64,29%              |
| 8    | 25          | m                          | 25,11                    | n.a.             | n.a.             | 30                      |                                                                                                     |                                                                                                       | 4,05%                | 33,33%              |
| 9    | 38          | f                          | 26,00                    | n.a.             | n.a.             | 30                      |                                                                                                     |                                                                                                       | 4,26%                | 60,00%              |
| 10   | 38          | m                          | 23,00                    | n.a.             | n.a.             | 30                      |                                                                                                     |                                                                                                       | 3,40%                | 46,15%              |
| 11   | 35          | f                          | n.a.                     | n.a.             | n.a.             | 30                      |                                                                                                     |                                                                                                       | 10,87%               | 58,25%              |
| 12   | 58          | f                          | n.a.                     | n.a.             | n.a.             | 30                      |                                                                                                     |                                                                                                       | 4,95%                | 38,71%              |
| 13   | 48          | f                          | n.a.                     | n.a.             | n.a.             | 30                      |                                                                                                     |                                                                                                       | 6,91%                | 92,86%              |
| 14   | 52          | m                          | 23,84                    | 175              | 73               | 30                      |                                                                                                     |                                                                                                       | 7,34%                | 58,39%              |
| 15   | 42          | m                          | 32,14                    | 185              | 110              | 30                      |                                                                                                     |                                                                                                       | 6,06%                | 47,96%              |
| 16   | 52          | f                          | n.a.                     | n.a.             | n.a.             | 30                      |                                                                                                     |                                                                                                       | 4,36%                | 56,34%              |
| 17   | 32          | m                          | 27,30                    | n.a.             | n.a.             | 30                      |                                                                                                     |                                                                                                       | 4,72%                | 16,67%              |
| 18   | 58          | m                          | 26,50                    | n.a.             | n.a.             | 30                      |                                                                                                     |                                                                                                       | 4,78%                | 42,03%              |
| 19   | 55          | f                          | 27,00                    | n.a.             | n.a.             | 30                      |                                                                                                     |                                                                                                       | 4,87%                | 21,29%              |
| 20   | 55          | m                          | 24,10                    | n.a.             | n.a.             | 30                      |                                                                                                     |                                                                                                       | 3,04%                | 14,24%              |
| 21   | 45          | m                          | 26,87                    | 183              | 90               | 30                      |                                                                                                     |                                                                                                       | 7,08%                | 56,90%              |
| 22   | 55          | m                          | 23,00                    | n.a.             | n.a.             | 30                      | arterial hypertension                                                                               | ramipril                                                                                              | 5,04%                | 32,20%              |
| 23   | 45          | f                          | 27,10                    | 163              | 72               | 30                      |                                                                                                     |                                                                                                       | 3,95%                | 65,91%              |
| 24   | 35          | m                          | 29,32                    | 180              | 95               | 30                      |                                                                                                     |                                                                                                       | 12,61%               | 37,17%              |
| 25   | 42          | f                          | n.a.                     | n.a.             | n.a.             | 30                      |                                                                                                     |                                                                                                       | 5,54%                | 41,67%              |
| 26   | 45          | m                          | n.a.                     | n.a.             | n.a.             | 30                      | arterial hypertension                                                                               | metoprolol                                                                                            | 1,87%                | 13,75%              |
| 27   | 40          | m                          | 29,61                    | 181              | 97               | 30                      |                                                                                                     |                                                                                                       | 8,03%                | 79,82%              |
| 28   | 46          | f                          | 29,40                    | 174              | 89               | 30                      |                                                                                                     |                                                                                                       | 2,95%                | 56,63%              |
| 29   | 64          | f                          | n.a.                     | n.a.             | n.a.             | 30                      |                                                                                                     |                                                                                                       | 5,97%                | -                   |
| 30   | 63          | m                          | n.a.                     | n.a.             | n.a.             | 30                      |                                                                                                     |                                                                                                       | 9,80%                | -                   |
| 31   | 88          | f                          | n.a.                     | n.a.             | n.a.             | 30                      | cardiac insufficiency, osteoporosis                                                                 | phenprocoumon                                                                                         | 27,85%               | -                   |
| 32   | 75          | f                          | n.a.                     | n.a.             | n.a.             | 30                      |                                                                                                     |                                                                                                       | 7,69%                | -                   |
| 33   | 67          | f                          | n.a.                     | n.a.             | n.a.             | 30                      | arterial hypertension, hyperlipidemia, hyperuricemia                                                | metoprolol, telmisartan, simvastatin, allopurinol                                                     | 6,56%                | -                   |
| 34   | 79          | m                          | n.a.                     | n.a.             | n.a.             | 30                      | arterial hypertension, hyperlipidemia, chronic obstructive pulmonary disease, cardiac insufficiency | metoprolol, telmisartan, pentaerythrityltetranitrat, simvastatin, acetylsalicylic acid, spironolacton | 10,73%               | -                   |
| 35   | 64          | f                          | n.a.                     | n.a.             | n.a.             | 30                      | arterial hypertension                                                                               | enalapril                                                                                             | 16,59%               | -                   |
| 36   | 82          | m                          | n.a.                     | n.a.             | n.a.             | 30                      | arterial hypertension, hyperlipidemia, hypothyroidism                                               | metoprolol, ramipril, simvastatin, acetylsalicylic acid                                               | 13,32%               | -                   |
| 37   | 74          | f                          | n.a.                     | n.a.             | n.a.             | 29                      |                                                                                                     |                                                                                                       | 9,89%                | 30,46%              |
| 38   | 86          | m                          | n.a.                     | n.a.             | n.a.             | 29                      | arterial hypertension                                                                               | furosemid, metoprolol, acetylsalicylic acid                                                           | 3,45%                | 29,34%              |
| 39   | 72          | m                          | n.a.                     | n.a.             | n.a.             | 30                      |                                                                                                     |                                                                                                       | 5,84%                | 80,77%              |
| 40   | 76          | f                          | 26,90                    | 159              | 68               | 29                      | arterial hypertension, hypothyroidism                                                               | ramipril, nebilolol, levothyroxin                                                                     | 7,46%                | 77,78%              |
| 41   | 73          | f                          | n.a.                     | n.a.             | n.a.             | 29                      | arterial hypertension, hyperlipidemia, hypothyroidism                                               | enalapril, bisoprolol, acetylsalicylic acid                                                           | 7,17%                | 37,09%              |
| 42   | 61          | f                          | n.a.                     | n.a.             | n.a.             | 29                      |                                                                                                     |                                                                                                       | 7,98%                | -                   |

**Supplementary Table 2. Correlation between blood parameters and age.**

The most important blood parameters and by FACS analysis received results were correlated with age and shown as Pearson correlation coefficient.

correlations

|                              | age [years]                     |                     | N  |
|------------------------------|---------------------------------|---------------------|----|
|                              | Pearson correlation coefficient | P-value(two-tailed) |    |
| number of leukocytes[Gpt/l]  | -.396**                         | .009                | 42 |
| lymphocytes [%]              | -.388*                          | .011                | 42 |
| number of lymphocytes[Gpt/l] | -.557**                         | .000                | 42 |
| monocytes [%]                | .218                            | .165                | 42 |
| number of monocytes [Gpt/l]  | -.093                           | .556                | 42 |
| PBMC [%]                     | -.193                           | .221                | 42 |
| number of PBMC [Gpt/l]       | -.439**                         | .004                | 42 |
| triglyceride [mmol/l]        | .078                            | .622                | 42 |
| choleresterol [mmol/l]       | .335*                           | .030                | 42 |
| HDL [mmol/l]                 | .026                            | .871                | 42 |
| HbA1c [%]                    | .555**                          | .000                | 42 |
| VGF+ CD3+ / CD3+ [%]         | .536**                          | .000                | 42 |
| VGF+ CD56+ / CD56+[%]        | .204                            | .256                | 33 |

\*\* . P-value < 0.005

\*. P-Value <0.05
